# Supplementary material for: “You can change your life through sports”: Physical activity interventions to improve the health and wellbeing of adults experiencing homelessness: a mixed methods systematic review
Source: medRxiv preprint, doi:10.1101/2023.07.26.23293203, version 1 (2023-07-27)
Supplement: Supplementary File 3 [file 293203_file08.docx]

| **Overarching theme** | **Theme** | **Sub theme** | **Level of confidence in evidence for intervention type** |
| --- | --- | --- | --- |
| Physical health benefits of physical activity interventions for PEH | Belief that physical activity improves the body shape of people experiencing homelessness | Improved body shape and self-image | **High** (Running groups[1], Indoor group instructor-led exercise[2]) |
| Weight loss | **High** (Running groups[1])  **Low** (Soccer- group training[3]) |
| Belief that physical activity improves physical condition of people experiencing homelessness | Perception of improved fitness levels | **High** (Running groups[1], Soccer- group training and Tournament participation[4], Indoor group instructor-led exercise[2])  **Moderate** (Earn-a-bike[5])  **Low** (Soccer- group training[3])  **Very Low** (Group instructor-led dance[6]) |
| Physical skill development | **Moderate** (Group Outdoor adventure[7])  **Low** (Soccer- group training[3])  **Very Low** (Group instructor-led dance[6]) |
| Belief that participating in physical activity interventions makes people experiencing homelessness more active in general | Participating in the physical activity intervention increased physical activity in everyday life | **High** (Running groups[1], Indoor group instructor-led exercise[2])  **Moderate** (Earn-a-bike[5])  **Low** (Soccer-group training[3]) |
| Broader aspects of the intervention (clothes, equipment, skill) facilitated physical activity participation | **High** (Running groups[1])  **Very Low** (Group instructor-led dance[6]) |
| Mental health benefits of physical activity interventions for PEH | Belief that physical activity facilitated people experiencing homelessness in self-develop and their ability to cope with life situations | Confidence, empowerment and self-esteem | **High** (Group running[1], Soccer- group training and tournament participation[4], Indoor group instructor-led exercise[2])  **Moderate** (Earn-a-bike[5], Group outdoor adventure[7])  **Low** (Gardening group[8], Soccer- group training[3])  **Very low** (Group instructor-led dance[6]) |
| Resilience, coping and hope | **High** (Group running[1], Group outdoor adventure[9])  **Moderate** (Group outdoor adventure[7])  **Low** (Gardening group[8], Soccer- group training[3])  **Very low** (Group instructor-led dance[6]) |
| Belief that physical activity resulted in people experiencing homelessness feeling mentally better | Independence, focus, personal development and relationships | **High** (Group running[1], Soccer- group training and tournament participation[4])  **Moderate** (Group outdoor adventure[7], Earn-a-bike[5])  **Low** (Gardening group[8], Soccer- group training and tournament participation [10])  **Very low** (Group instructor-led dance[6]) |
| Positive effect on stress and anxiety | **High** (Group running[1], Indoor group instructor-led exercise[2], Group outdoor adventure[9])  **Moderate** (Soccer- tournament participation[11], Earn-a-bike[5])  **Low** (Gardening group[8], Soccer- group training and tournament participation [10])  **Very low** (Group instructor-led dance[6]) |
| The impact of physical activity interventions on the wider life of PEH | Belief that the benefits of physical activity interventions carry into wider life of people experiencing homelessness | Development of life and interpersonal skills | **High** (Group running[1], Group outdoor adventure[9])  **Moderate** (Soccer- tournament participation[11], Earn-a-bike[5], Group outdoor adventure[7])  **Low** (Soccer- group training and tournament participation[10], soccer- group training[3], Gardening group[8])  **Very low** (Group instructor-led dance[6]) |
| Improved social connection and building relationships with others | **High** (Group running[1], Group outdoor adventure[9])  **Moderate** (Soccer- tournament participation[11], Earn-a-bike[5], Group outdoor adventure[7])  **Low** (Soccer- group training and tournament participation[10], soccer- group training[3], Gardening group[8]) |
| Physical activity as a catalyst for positive healthy life change | **High** (Group outdoor adventure[9])  **Moderate** (Soccer- tournament participation[11])  **Low** (Soccer- group training and tournament participation[10], Gardening group[8]) |
| Practical and functional benefits developed from participation | **Moderate** (Earn-a-bike[5])  **Low** (Soccer- group training and tournament participation[10], soccer- group training[3]) |
| Perception of challenges related to physical activity participation whilst homeless | Homelessness presents specific barriers to PA participation | **High** (Group running[1])  **Moderate** (Earn-a-bike[5])  **Low** (Soccer- group training and tournament participation[10], soccer- group training[3])  **Very low** (Group instructor-led dance[6]) |
| Participating in soccer tournaments can be stressful | **High** (Soccer- group training and tournament participation[4])  **Moderate** (Soccer- tournament participation[11]) |
| Perceived poor performance/ aptitude can negatively impact confidence and coping | **High** (Soccer- group training and tournament participation[4])  **Moderate** (Soccer- tournament participation[11])  **Very low** (Group instructor-led dance[6]) |
| Belief of physical activity positive impact on self-medication, prescribed medication and addiction for people experiencing homelessness | Reduction in need for prescription medication and self-medication | **Moderate** (Earn-a-bike[4]) |
| Reduced substance misuse | **High** (Soccer- group training and tournament participation[10])  **Moderate** (Earn-a-bike[4])  **Low** (soccer- group training[7]) |
| Diversion from temptation of addiction | **Low** (soccer- group training[7]) |

1. Dawes, J., C. Sanders, and R. Allen, *"A Mile in Her Shoes": A qualitative exploration of the perceived benefits of volunteer led running groups for homeless women.* Health & social care in the community, 2019. **27**(5): p. 1232-1240.

2. Malden, S., et al., *A theory based evaluation of an intervention to promote positive health behaviors and reduce social isolation in people experiencing homelessness.* Journal of social distress and the homeless, 2019. **28**(2): p. 158-168.

3. Sherry, E. and V. Strybosch, *A kick in the right direction: longitudinal outcomes of the Australian Community Street Soccer Program.* Soccer & Society, 2012. **13**(4): p. 495-509.

4. Magee, J. and R. Jeanes, *Football’s coming home: A critical evaluation of the Homeless World Cup as an intervention to combat social exclusion.* International Review for the Sociology of Sport, 2011. **48**(1): p. 3-19.

5. Grimes, A. and M. Smirnova, *Perspectives on an earn-a-bike intervention on transportation, health and self- esteem among men experiencing homelessness.* Journal of Transport & Health, 2020. **18**: p. 11.

6. Knestaur, M., M.A. Devine, and B. Verlezza, *'It Gives Me Purpose': The Use of Dance with People Experiencing Homelessness.* Therapeutic Recreation Journal, 2010. **44**(4): p. 289-301.

7. Parry, B.J., et al., *Improving outcomes in young people experiencing homelessness with My Strengths Training for Life™ (MST4Life™): A qualitative realist evaluation.* Children and Youth Services Review, 2021. **121**: p. 105793.

8. Grabbe, L., J. Ball, and A. Goldstein, *Gardening for the mental well-being of homeless women.* Journal of holistic nursing : official journal of the American Holistic Nurses' Association, 2013. **31**(4): p. 258-66.

9. Parry, B.J., et al., *Promoting Personal Growth in Young People Experiencing Homelessness Through an Outdoors-Based Program.* 2021, 2021. **16**(5): p. 36.

10. Sherry, E., *(Re)engaging marginalized groups through sport: The Homeless World Cup.* International Review for the Sociology of Sport, 2010. **45**(1): p. 59-71.

11. Peachey, J., et al., *Street Soccer USA Cup: Preliminary findings of a sport-for-homeless intervention.* The ICHPER-SD Journal of Research, 2013. **8**: p. 3-11.
